# Supplementary material for: Sublimable cationic iridium(iii) complexes for red-emitting diodes with high colour purity
Source: Royal Society of Chemistry journal article supplement (doi:10.1039/d0tc04126b), 2020-01-01
Supplement: d0tc04126b1.pdf [file d0tc04126b1.pdf]

## **Supplementary Information**

### **Sublimable cationic iridium(III) complexes for red-emitting diodes with high colour purity**

Ruihuan Liu<sup>a</sup>, Dongxin Ma<sup>\*a</sup>, Lian Duan<sup>\*ab</sup>

<sup>a</sup>Key Lab of Organic Optoelectronics & Molecular Engineering of Ministry of Education, Department of Chemistry, Tsinghua University, Beijing 100084, P. R. China

<sup>b</sup>Center for Flexible Electronics Technology, Tsinghua University, Beijing 100084, P. R. China

E-mail: duanl@mail.tsinghua.edu.cn, madongxin@tsinghua.edu.cn

### **Supplemental Experimental Section**

- 1. Experimental Procedures**
- 2. Supporting Figures**
- 3. Supporting Tables**

## 1. Experimental Procedures

**Structural Characterization Methods.**  $^1\text{H}$ -NMR and  $^{19}\text{F}$ -NMR spectra were recorded on a JOEL JNM-ECA600 NMR spectrometer. ESI mass spectrometry was performed with Thermo Electron Corporation Finnigan LTQ.

**X-Ray Crystallography.** The single crystal X-ray diffraction data collections were carried out on a Rigaku AFC-10/Saturn 724+ charge-coupled device (CCD) diffractometer equipped with graphite-monochromatized Mo K $\alpha$  radiation ( $\lambda = 0.71073 \text{ \AA}$ ) using the multi-scan technique. The structures were determined by direct methods using SHELXS-97 and refined by full-matrix least-squares procedures on F2 with SHELXL-2008. All the non-hydrogen atoms were obtained from the difference Fourier map and subjected to anisotropic refinement by full-matrix least squares on F2. The hydrogen atoms were obtained geometrically and treated as riding on the parent atoms or constrained in the locations during refinements.

**Photophysical, Electrochemical and Thermal Measurements.** Absorption and photoluminescence (PL) spectra were characterized with an ultraviolet-visible spectrophotometer (Agilent 8453) and a fluorospectrophotometer (HITACHI, F-7000), respectively. Photoluminescence quantum yields (PLQYs) in degassed anhydrous acetonitrile solutions and neat film were measured at the excitation wavelength of 400 nm (Hamamatsu Photonics K. K., C9920-03). The excited state lifetimes were measured by a lifetime and steady state spectrometer (Edinburgh Instruments, FLS 980) with time-correlated single-photon counting technique at the peak emitting wavelength. Cyclic voltammetry was proved in oxygen-free anhydrous solutions on a Princeton Applied Research potentiostat/ galvanostat

Model 283 voltammetric analyzer at a scan rate of  $100 \text{ mV s}^{-1}$  with a platinum plate as the working electrode, a silver wire as the pseudo-reference electrode and a platinum wire as the counter electrode. Oxidation potentials were measured in *N,N*-dimethyl formamide with tetrabutylammonium perchlorate ( $40 \text{ mg mL}^{-1}$ ) as the supporting electrolyte, while reduction potentials were performed in acetonitrile with tetrabutylammonium hexafluorophosphate ( $35 \text{ mg mL}^{-1}$ ) as the supporting electrolyte. Ferrocene served as the internal standard. Thermal stability was measured by a thermogravimetric analyzer (TA Instruments Q5000) with a heating rate of  $10^\circ\text{C min}^{-1}$  under nitrogen flows.

**Quantum Chemical Calculations.** Calculations on the volume of both the coordinated iridium (III) cations and tetraphenylborate-type anions were performed by means of DFT using ‘opt=tight rb3lyp/gen geom=connectivity pseudo=read’. Calculations on the ground electronic states of the emissive coordinated iridium (III) cations were performed by means of DFT using ‘opt=tight rb3lyp/gen geom=connectivity pseudo=read’. Calculations on the excited electronic states of the emissive coordinated iridium (III) cations were performed by means of TD-DFT using ‘td=(50-50,nstates=5) b3lyp/gen geom=connectivity pseudo=read’. The double- $\xi$  quality basis sets were 6-31G\* for the carbon, hydrogen, nitrogen, fluorine and LANL2DZ for iridium. The inner core electrons of iridium (III) were replaced by an effective core potential (ECP), with outer core of  $5s^2 5p^6$  electrons and the  $5d^6$  valence electrons. All the quantum chemical calculations were performed with Gaussian 09 software package using a spin restricted formalism (see the reference).

**Device fabrication and evaluation.** OLEDs were grown on cleaned, ultraviolet-ozone-treated and indium-tin-oxide-coated glass substrates, with a sheet resistance of about  $20 \Omega$  per sq. Each functional layer was fabricated thereon successively by vacuum evaporation deposition under a low pressure below  $5 \times 10^{-4}$  Pa. Each device shows an active area of  $3.0 \times 3.0 \text{ mm}^2$ . Current density-luminance-voltage (*J-L-V*) characteristics were collected with Keithley 4200 semiconductor system, while electroluminescence (EL) spectra were recorded by a Photo Research PR705 spectrophotometer. Device measurements were carried out at room temperature in the ambient air without further encapsulation.

## 2. Supporting Figures

**Scheme S1.** Synthetic routes of complexes **1** and **2**.

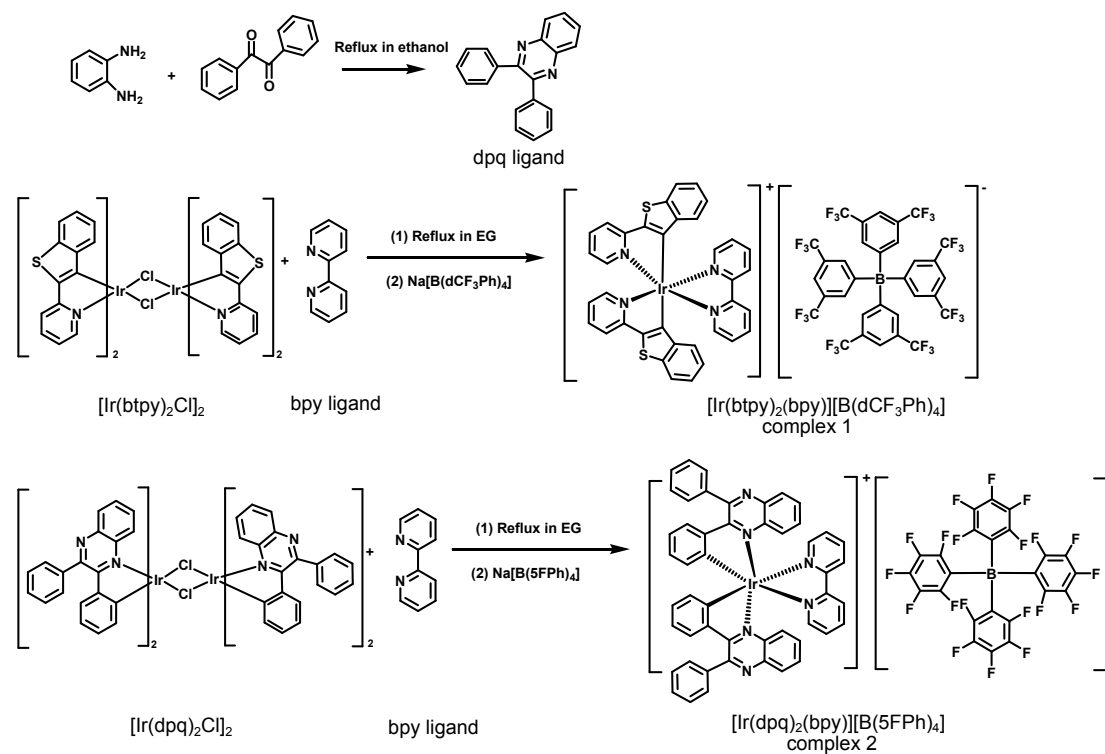

**Fig. S1.** The single-crystal structure of  $[\text{Ir}(\text{btpy})_2(\text{bpy})][\text{B}(\text{dCF}_3\text{Ph})_4]$  (complex **1**). Here the thermal ellipsoids are drawn at the 30% probability level. The solvent molecules and hydrogen atoms are omitted for clarity. The unlabeled atoms are carbon atoms.

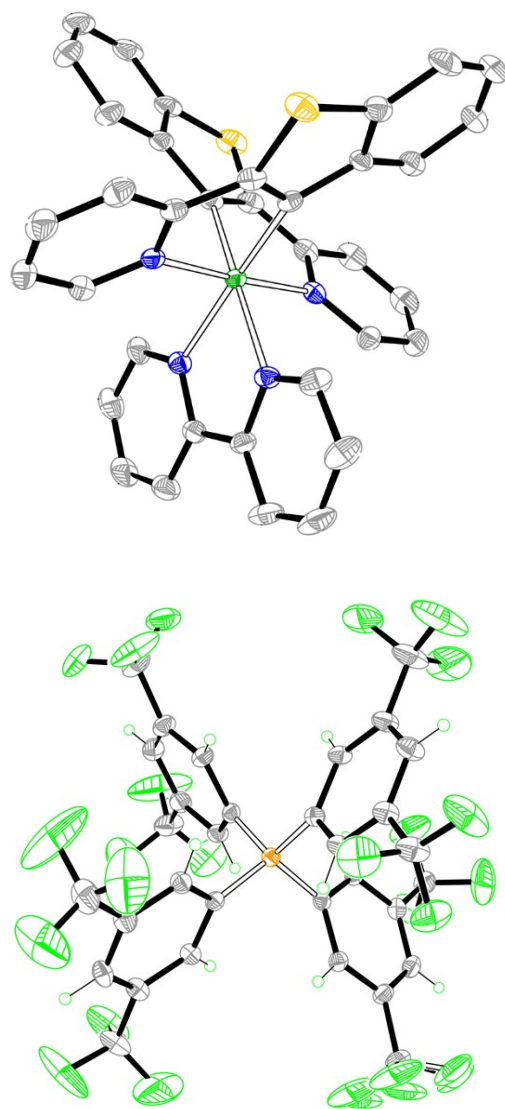

**Fig. S2.** (a) Absorption spectra and (b) the excited state lifetime in neat films at 298 K of complexes **1** and **2**.

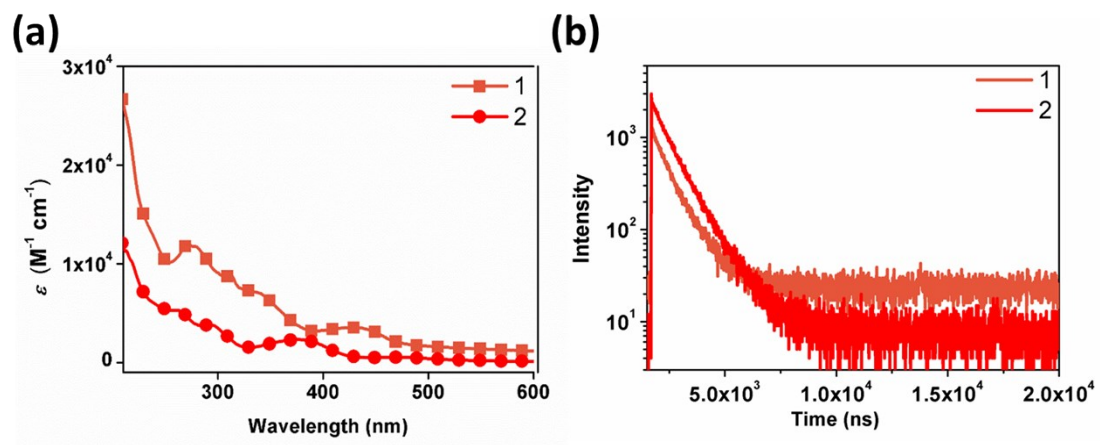

Fig. S3. Cyclic voltammogram of complexes 1 and 2 in oxygen-free anhydrous solutions with potentials recorded versus the ferrocenium/ ferrocene ( $\text{Fc}^+ / \text{Fc}$ ) couple.

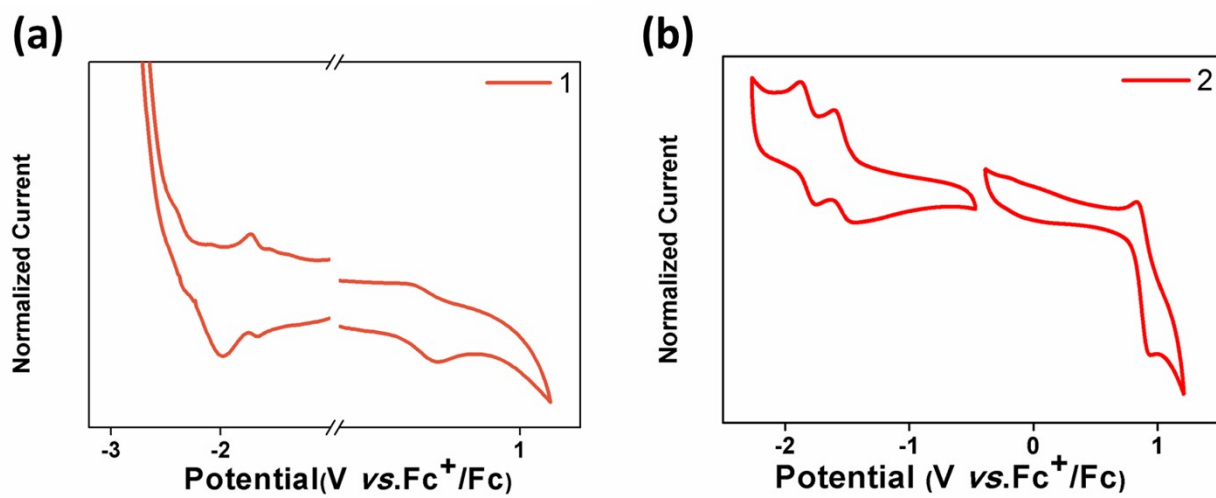



**Fig. S4.** TGA of complexes **1** and **2** under nitrogen-flow conditions.

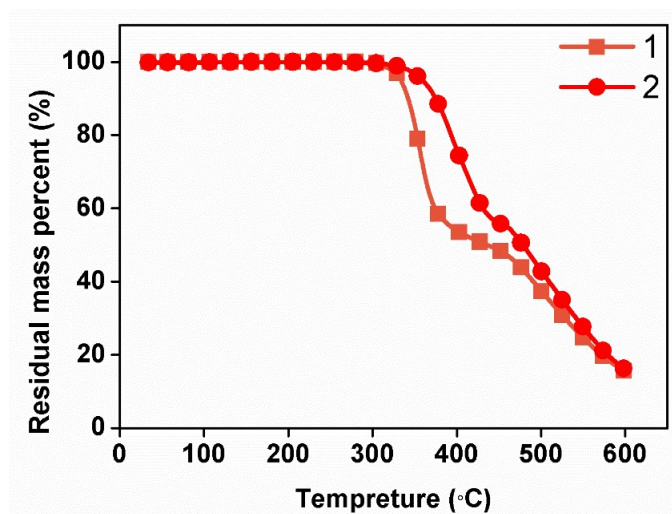

Fig. S5. MO surfaces of complex 1 ( $|\Psi| = 0.02$ ).

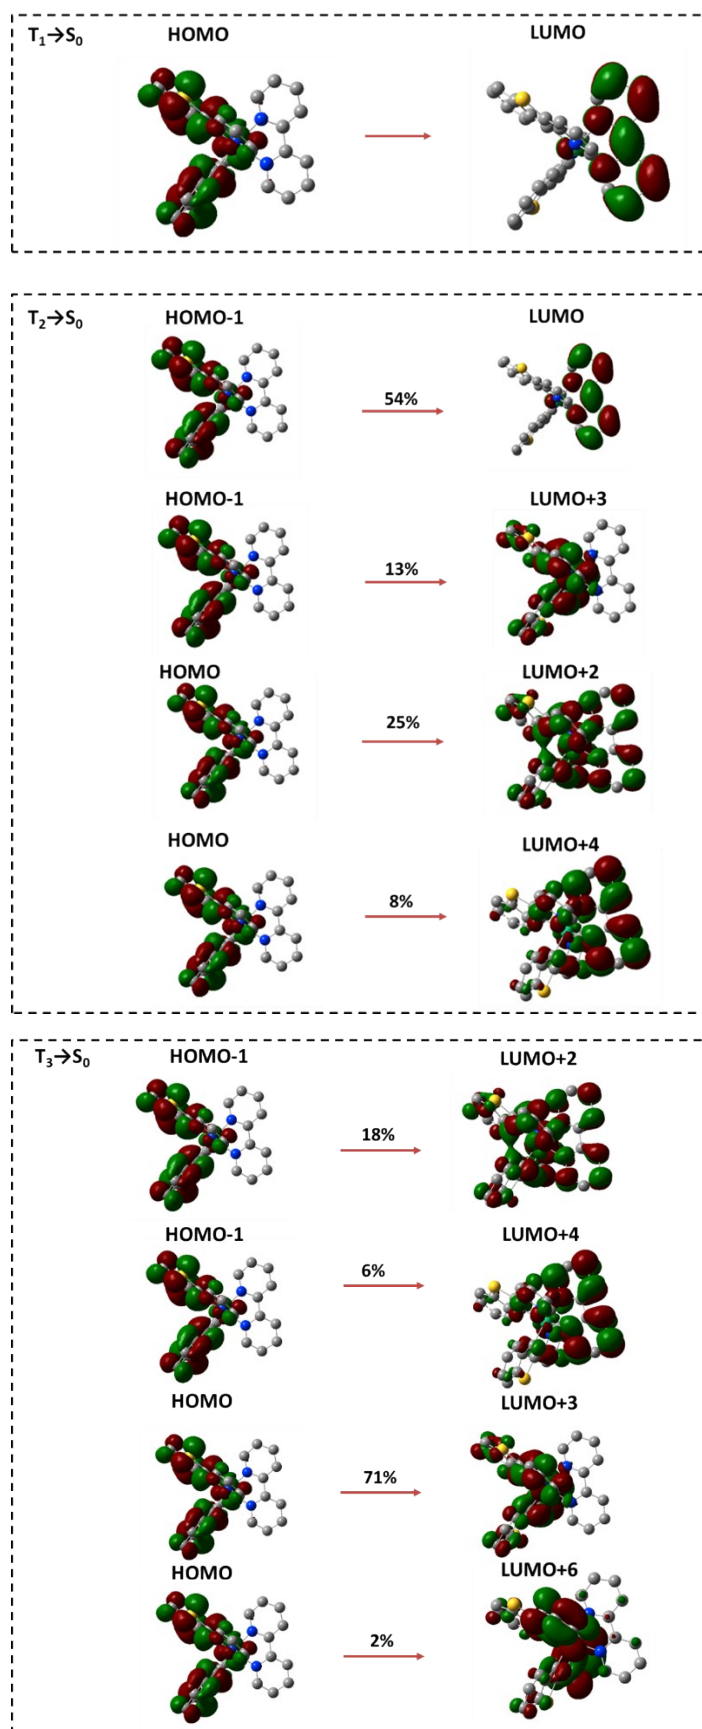

**Fig. S6.** MO surfaces of complex **2** ( $|\Psi| = 0.02$ ).

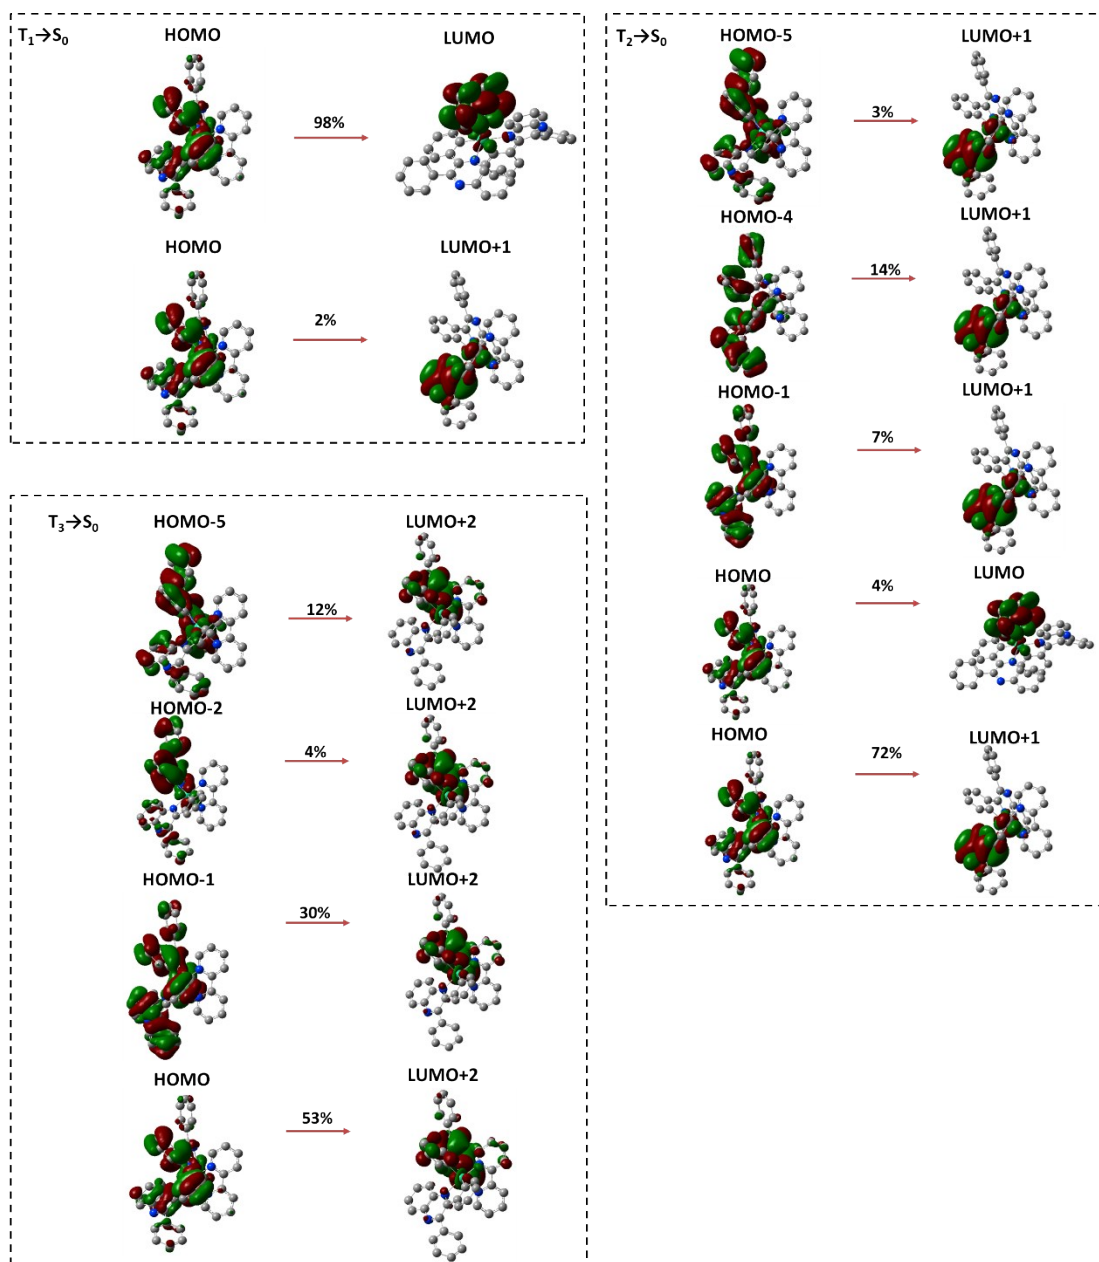

**Fig. S7.** Characteristics of OLEDs based on complex **1** with the structure of ITO/ HATCN (5 nm)/ NPB (40 nm)/ TCTA (10 nm)/ DIC-TRZ:  $x\%$  complex **1** (12 nm)/ BPBiPA (50 nm)/ LiF (1 nm)/ Al (150 nm) at varying dopant concentrations. (a) Current density-voltage, (b) Luminance-voltage, (c) Current efficiency-luminance curves, (d) EL spectra.

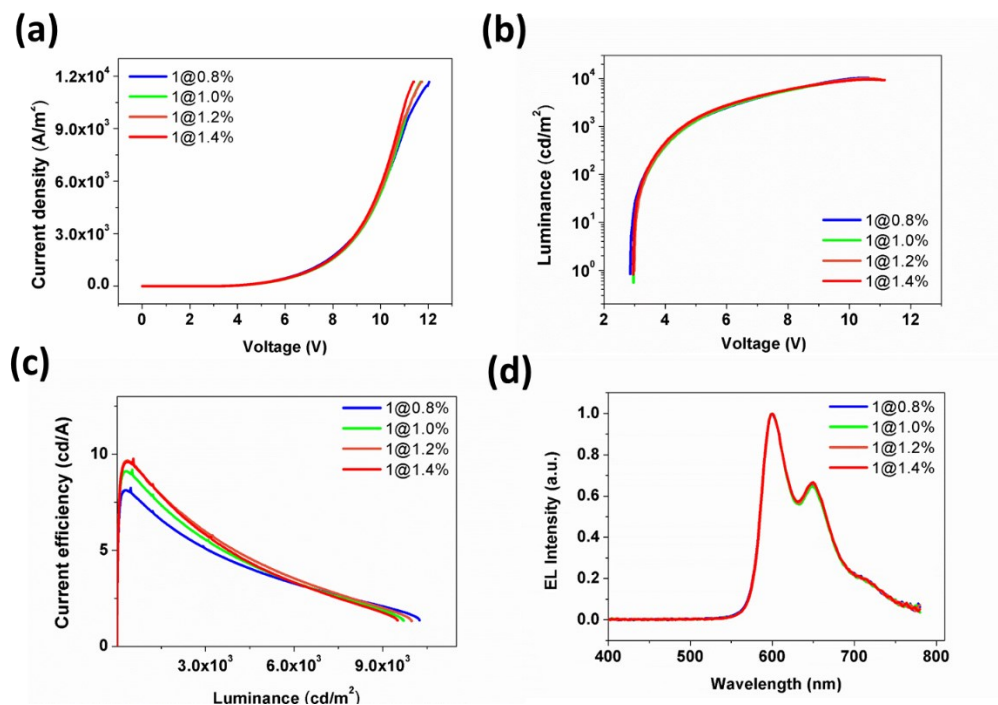

**Fig. S8.** Characteristics of OLEDs based on complex **2** with the structure of ITO/ HATCN (5 nm)/ NPB (40 nm)/ TCTA (10 nm)/ DIC-TRZ:  $x\%$  complex **2** (12 nm)/ BPBiPA (50 nm)/ LiF (1 nm)/ Al (150 nm) at varying dopant concentrations. (a) Current density-voltage, (b) Luminance-voltage, (c) Current efficiency-luminance curves, (d) EL spectra.

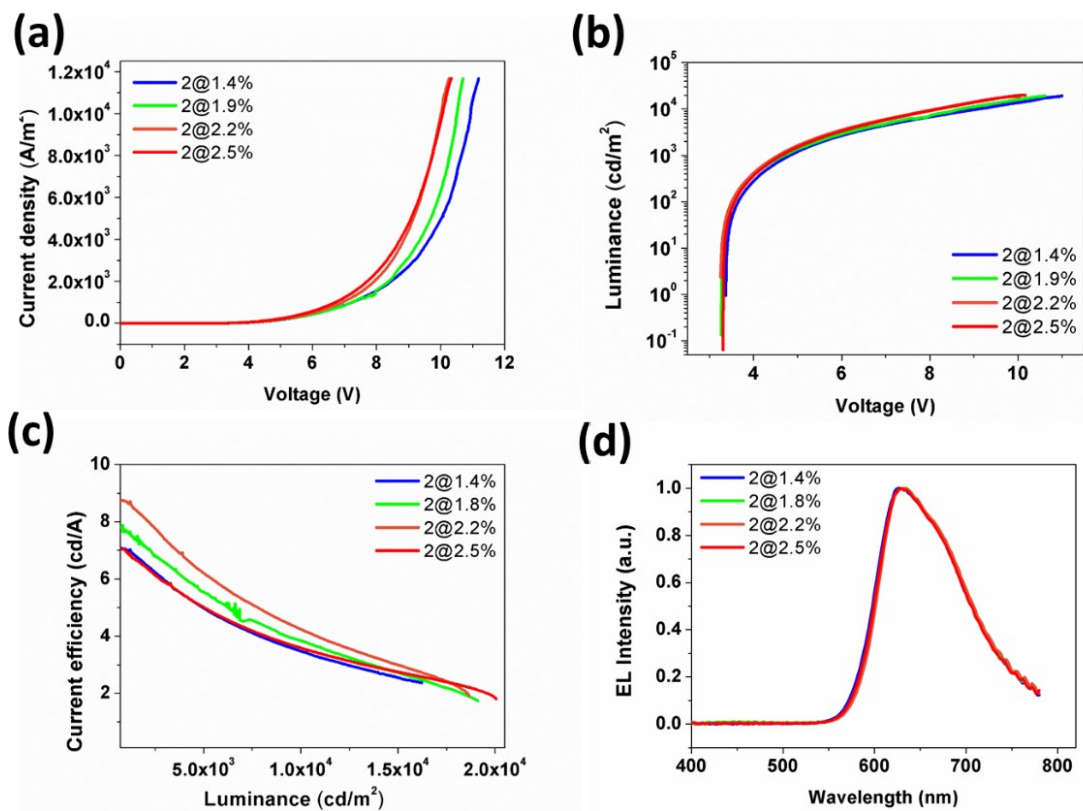

### 3. Supporting Tables

**Table S1.** Bond lengths and angles of complex **1** from X-ray crystallography data.

|                      | Ir-C (Å)          | Ir-N (Å)                                                           | Angles(°)                    |
|----------------------|-------------------|--------------------------------------------------------------------|------------------------------|
| Molecule <b>1</b>    | Ir(1)-C(20) 2.014 | Ir(1)-N(1)<br>2.062                                                | C(20)-Ir(1)-N(2)<br>79.87    |
|                      |                   | Ir(1)-N(2)<br>2.067                                                | C(7)-Ir(1)-N(1)<br>79.69     |
|                      | Ir(1)-C(7) 2.009  | Ir(1)-N(3)<br>2.119                                                | N(3)-Ir(1)-N(4)<br>76.61     |
|                      |                   | Ir(1)-N(4)<br>2.143                                                |                              |
| Molecule <b>2</b>    | Ir(2)-C(47) 2.018 | Ir(2)-N(5)<br>2.058                                                | C(47)-Ir(2)-N(5)<br>79.51    |
|                      |                   | Ir(2)-N(6)<br>2.063                                                | C(60)-Ir(2)-N(6)<br>79.89    |
|                      | Ir(2)-C(60) 2.046 | Ir(2)-N(7)<br>2.128                                                | N(7)-Ir(2)-N(8)<br>76.77     |
|                      |                   | Ir(2)-N(8)<br>2.133                                                |                              |
| Average <sup>a</sup> | Ir-C 2.022        | Ir-N(C <sup>^</sup> N)<br>2.063<br>Ir-N(N <sup>^</sup> N)<br>2.131 | C-Ir-N 79.74<br>N-Ir-N 76.69 |

<sup>a</sup>Average data of bond lengths and angles of complex **1** from X-ray crystallography data.

**Table S2.** Bond lengths and angles of complex **1** from calculated results.

|                  | Ir-C (Å)   | Ir-N (Å)                        | Angles(°)    |
|------------------|------------|---------------------------------|--------------|
| Complex <b>1</b> | Ir-C 2.034 | Ir-N(C <sup>^</sup> N)<br>2.096 | C-Ir-N 79.88 |
|                  |            | Ir-N(N <sup>^</sup> N)<br>2.202 | N-Ir-N 75.12 |

**Table S3.** Contribution of iridium to selected HOMOs of complexes **1** and **2**.

| Molecular orbital | Contribution of iridium (%) |           |
|-------------------|-----------------------------|-----------|
|                   | Complex 1                   | Complex 2 |
| H                 | 21.28                       | 34.41     |
| H-1               | 0.83                        | 14.86     |
| H-2               | -                           | 10.67     |
| H-4               | -                           | 6.02      |
| H-5               | -                           | 8.03      |



**Table S4.** Device characteristics of red OLEDs based on complexes **1** and **2**.

| Complex  | Ratio [%] | $V_{\text{on}}^{\text{a}}$ [V] | Max CE <sup>b</sup> [cd A <sup>-1</sup> ] | CE <sup>b</sup> at 10 <sup>3</sup> cd m <sup>-2</sup> [cd A <sup>-1</sup> ] | CE <sup>b</sup> at 10 <sup>4</sup> cd m <sup>-2</sup> [cd A <sup>-1</sup> ] | Max EQE <sup>c</sup> [%] | Max PE <sup>d</sup> [lm W <sup>-1</sup> ] | Max $L^{\text{e}}$ [cd m <sup>-2</sup> ] | $\lambda_{\text{EL}}^{\text{f}}$ [nm] | CIE <sup>g</sup> (x, y) |
|----------|-----------|--------------------------------|-------------------------------------------|-----------------------------------------------------------------------------|-----------------------------------------------------------------------------|--------------------------|-------------------------------------------|------------------------------------------|---------------------------------------|-------------------------|
| <b>1</b> | 0.8       | 2.6                            | 8.2                                       | 7.2                                                                         | 1.6                                                                         | 6.0                      | 7.1                                       | 10.3×10 <sup>3</sup>                     | 600,650(sh)                           | (0.63,0.37)             |
|          | 1.0       | 2.7                            | 9.2                                       | 8.1                                                                         | -                                                                           | 6.7                      | 7.7                                       | 9.7×10 <sup>3</sup>                      | 600,650(sh)                           | (0.63,0.37)             |
|          | 1.2       | 2.7                            | 9.8                                       | 8.6                                                                         | -                                                                           | 7.2                      | 8.1                                       | 10.0×10 <sup>3</sup>                     | 600,650(sh)                           | (0.63,0.37)             |
|          | 1.4       | 2.7                            | 9.7                                       | 8.7                                                                         | -                                                                           | 7.1                      | 8.2                                       | 9.5×10 <sup>3</sup>                      | 600,650(sh)                           | (0.63,0.37)             |
| <b>2</b> | 1.4       | 2.4                            | 7.1                                       | 7.0                                                                         | 3.5                                                                         | 7.8                      | 5.2                                       | 19.2×10 <sup>3</sup>                     | 628                                   | (0.66,0.34)             |
|          | 1.9       | 2.4                            | 7.9                                       | 7.7                                                                         | 3.8                                                                         | 9.1                      | 6.0                                       | 19.1×10 <sup>3</sup>                     | 634                                   | (0.66,0.33)             |
|          | 2.2       | 2.4                            | 8.8                                       | 8.7                                                                         | 4.2                                                                         | 10.3                     | 6.8                                       | 18.7×10 <sup>3</sup>                     | 632                                   | (0.67,0.33)             |
|          | 2.5       | 2.5                            | 7.1                                       | 6.7                                                                         | 3.6                                                                         | 7.8                      | 5.4                                       | 20.0×10 <sup>3</sup>                     | 628                                   | (0.66,0.34)             |

<sup>a</sup> $V_{\text{on}}$ , turn-on voltage. <sup>b</sup>CE, current efficiency. <sup>c</sup>EQE, external quantum efficiency. <sup>d</sup>PE, power efficiency. <sup>e</sup> $L$ , luminance. <sup>f</sup> $\lambda_{\text{EL}}$ , EL wavelength, *sh* denotes the shoulder peak. <sup>g</sup>CIE, Commission Internationale de l'Éclairage.
